# Supplementary material for: A modified ‘skeleton/skin’ strategy for designing CoNiP nanosheets arrayed on graphene foam for on/off switching of NaBH4 hydrolysis
Source: Royal Society of Chemistry journal article supplement (doi:10.1039/d0ra01892a), 2020-01-01
Supplement: d0ra01892a1.pdf [file d0ra01892a1.pdf]

## SUPPORTING INFORMATION

### A “skeleton/skin” strategy for designing CoNiP nanosheets arrayed on graphene

#### foam for on/off switching of NaBH<sub>4</sub> hydrolysis

Jinghua Li<sup>a,b</sup>, Xianyong Hong<sup>a,b</sup>, Yilong Wang<sup>a,b</sup>, Yumei Luo<sup>a,b</sup>, Bin Li<sup>a,b</sup>, Pengru Huang<sup>a,b</sup>, Yongjin Zou<sup>a,b</sup>, Hailiang Chu<sup>a,b</sup>, Shiyu Zheng<sup>c</sup>, Lixian Sun<sup>\*a,b</sup>, Fen Xu<sup>\*a,b</sup>, Yong Du<sup>d</sup>, Jianchuan Wang<sup>d</sup>, Federico Rosei<sup>e</sup>, Seifert Hans Jürgen<sup>f</sup>, Ulrich Sven<sup>f</sup>, Xiang Wu<sup>g</sup>

- a. School of Material Science & Engineering, Guilin University of Electronic Technology, Guilin 541004, PR China.
- b. Guangxi Key Laboratory of Information Materials and Guangxi Collaborative Innovation Center of Structure and Property for New Energy and Materials, Guilin 541004, PR China.
- c. School of Materials Science and Engineering, University of Shanghai for Science & Technology, Shanghai 200093, China
- d. State Key Laboratory of Powder Metallurgy, Central South University, Changsha Hunan, 410083, China.
- e. Institut National de La Recherche Scientifique—Énergie, Matériaux et Télécommunications, 1650, Boulevard Lionel-Boulet, J3X 1S2, Varennes, QC, Canada,
- f. Trieste University Karlsruhe Institute of Technology, Institute for Applied Materials, Hermann-von-Helmholtz-Platz 1, Bldg. 681, D-76344 Eggenstein-Leopoldshafen, Germany.
- g. School of Material Science & Engineering, Shenyang University of Technology, Shenyang 110870, PR China.

\*Corresponding authors

Prof. Dr. L. X. Sun

*E-mail address:* [sunlx@guet.edu.cn](mailto:sunlx@guet.edu.cn)

Prof. Dr. F. Xu

*E-mail address:* [xufen@guet.edu.cn](mailto:xufen@guet.edu.cn)

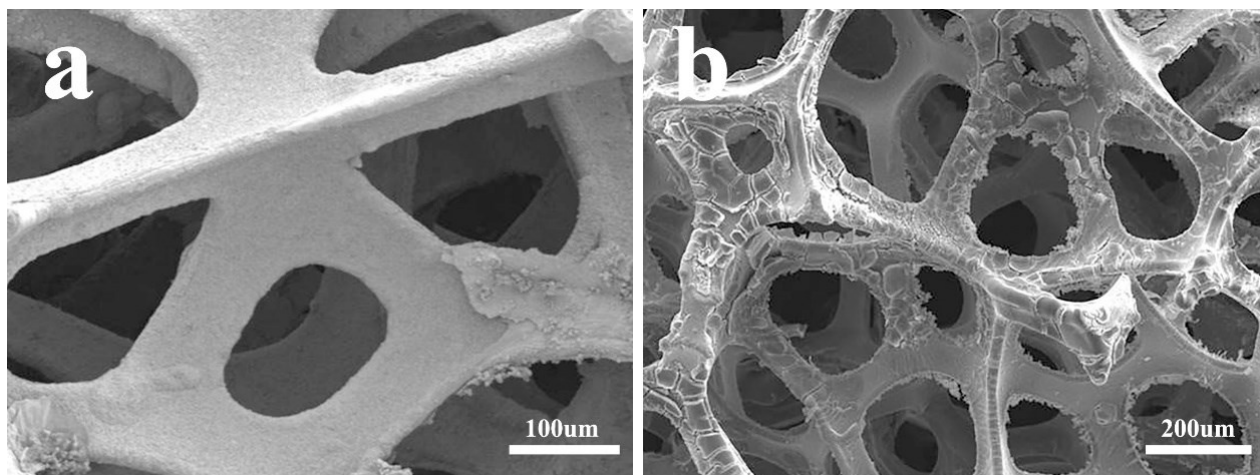

**Figure S1.** SEM images of (a) NiF and (b) Ni/GF;

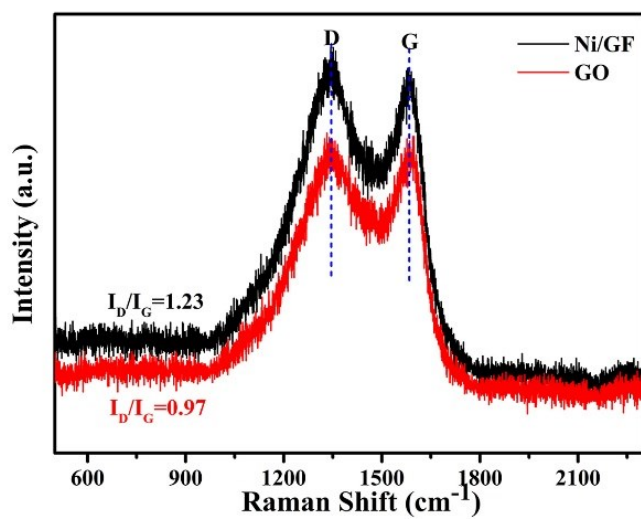

**Figure S2.** Raman spectra of GO and Ni/GF

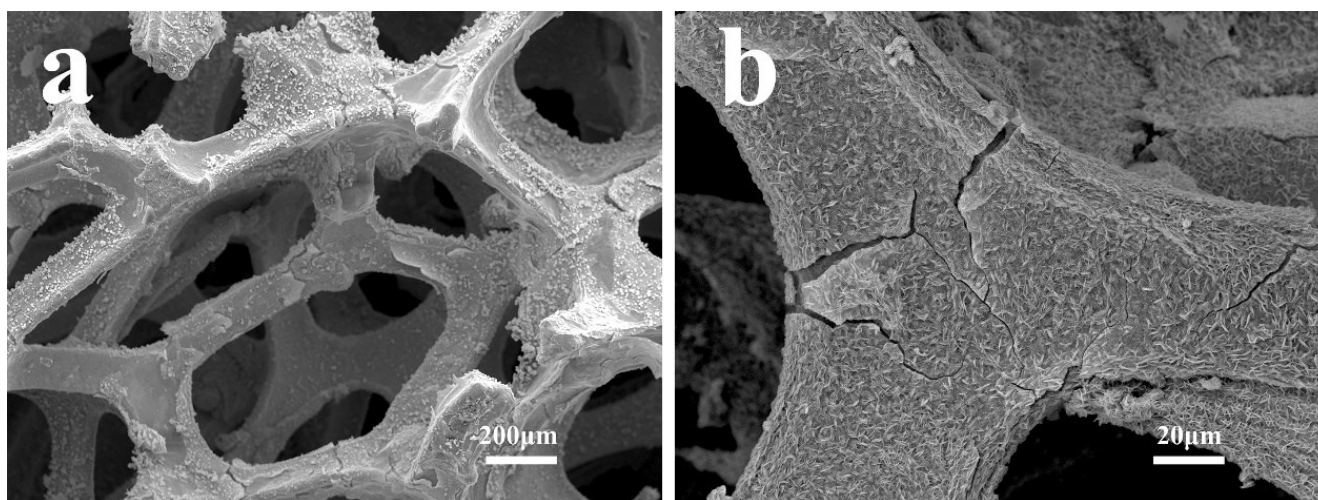

**Figure S3.** SEM images of Ni/GF/CoNiP

Table S1. Catalyst systems, number of cycles, and cyclic performance for NaBH<sub>4</sub> hydrolysis catalyzed by catalysts previously reported in the literature.

| Catalyst                                | Number of cycles | Cycling performance | Ref.      |
|-----------------------------------------|------------------|---------------------|-----------|
| Mn/CeO <sub>2</sub>                     | 5                | 55.0%               | 1         |
| Co-P                                    | 5                | 67.0%               | 2         |
| Co-P/CNTs-Ni foam                       | 8                | 74%                 | 3         |
| CoCuP/Al <sub>2</sub> O <sub>3</sub>    | 6                | 66.0%               | 4         |
| Co/Fe <sub>3</sub> O <sub>4</sub> -CNTs | 8                | 65.0%               | 5         |
| Co(0) nanoclusters                      | 15               | 31.0%               | 6         |
| Ni/GF/CoNiP                             | 15               | 74.9%               | This work |

## References

1. S. Duman and S. Özkar, Ceria supported manganese(0) nanoparticle catalysts for hydrogen generation from the hydrolysis of sodium borohydride, *International Journal of Hydrogen Energy*, 2018, **43**, 15262-15274.
2. Y. Wang, Y. Shen, K. Qi, Z. Cao, K. Zhang and S. Wu, Nanostructured cobalt–phosphorous catalysts for hydrogen generation from hydrolysis of sodium borohydride solution, *Renewable Energy*, 2016, **89**, 285-294.
3. F. Wang, Y. Zhang, Y. Wang, Y. Luo, Y. Chen and H. Zhu, Co-P nanoparticles supported on dandelion-like CNTs-Ni foam composite carrier as a novel catalyst for hydrogen generation from NaBH<sub>4</sub> methanolysis, *International Journal of Hydrogen Energy*, 2018, **43**, 8805-8814.
4. Z. Li, L. Wang, Y. Zhang and G. Xie, Properties of Cu Co P/γ-Al<sub>2</sub>O<sub>3</sub> catalysts for efficient hydrogen generation by hydrolysis of alkaline NaBH<sub>4</sub> solution, *International Journal of Hydrogen Energy*, 2017, **42**, 5749-5757.
5. H. A. Bandal, A. R. Jadhav and H. Kim, Cobalt impregnated magnetite-multiwalled carbon nanotube nanocomposite as magnetically separable efficient catalyst for hydrogen generation by NaBH<sub>4</sub> hydrolysis, *Journal of Alloys and Compounds*, 2017, **699**, 1057-1067.
6. M. Rakap and S. Özkar, Hydrogen generation from the hydrolysis of ammonia-borane using intrazeolite cobalt(0) nanoclusters catalyst, *International Journal of Hydrogen Energy*, 2010, **35**, 3341-3346.
